# Supplementary material
Source: publisher figshare collection journal article supplement (https://sage.figshare.com/ndownloader/files/23742708)
Supplement: Supplementary file 1 [file 23742708]

**Supplementary etable 1: Comparison of subgroup of MOGAD adults with relapsing course.**

| Adulthood onset                   | MOGAD<br>(N=64) | AQP4-IgG<br>NMOSD<br>(N=352) | Total<br>(N=467) | p value                           |
|-----------------------------------|-----------------|------------------------------|------------------|-----------------------------------|
| <b>Sex</b>                        |                 |                              |                  | <b>&lt;<br/>0.001<sup>1</sup></b> |
| F                                 | 35 (54.7%)      | 296 (84.1%)                  | 331<br>(79.6%)   |                                   |
| M                                 | 29 (45.3%)      | 56 (15.9%)                   | 85 (20.4%)       |                                   |
| <b>Age</b>                        |                 |                              |                  | <b>0.023<sup>2</sup></b>          |
| Median                            | 40.0            | 46.0                         | 45.5             |                                   |
| IQR                               | 30.0, 51.2      | 35.0, 56.0                   | 34.0, 55.2       |                                   |
| <b>Any autoimmune disease*</b>    | 8 (12.5%)       | 118 (33.5%)                  | 126<br>(30.3%)   | <b>&lt;<br/>0.001<sup>1</sup></b> |
| <b>Rheumatoid arthritis</b>       | 0 (0.0%)        | 9 (2.6%)                     | 9 (2.2%)         | 0.366 <sup>1</sup>                |
| <b>SLE</b>                        | 0 (0.0%)        | 25 (7.1%)                    | 25 (6.0%)        | <b>0.021<sup>1</sup></b>          |
| <b>Autoimmune thyroid disease</b> | 7 (10.9%)       | 69 (19.6%)                   | 76 (18.3%)       | 0.114 <sup>1</sup>                |
| <b>Sjogren's syndrome</b>         | 1 (1.6%)        | 18 (5.1%)                    | 19 (4.6%)        | 0.331 <sup>1</sup>                |
| <b>APS</b>                        | 0 (0.0%)        | 8 (2.3%)                     | 8 (1.9%)         | 0.615 <sup>1</sup>                |
| <b>Myasthenia Gravis</b>          | 0 (0.0%)        | 12 (3.4%)                    | 12 (2.9%)        | 0.227 <sup>1</sup>                |

|                                                |                |             |                |                                   |
|------------------------------------------------|----------------|-------------|----------------|-----------------------------------|
| <b>MCTD</b>                                    | 0 (0.0%)       | 2 (0.6%)    | 2 (0.5%)       | 1.000 <sup>1</sup>                |
| <b>Polymyositis</b>                            | 0 (0.0%)       | 1 (0.3%)    | 1 (0.2%)       | 1.000 <sup>1</sup>                |
| <b>Acetylcholine Receptor Binding (muscle)</b> |                |             |                | <b>0.026<sup>1</sup></b>          |
| Negative                                       | 44<br>(100.0%) | 128 (88.9%) | 172<br>(91.5%) |                                   |
| Positive                                       | 0 (0.0%)       | 16 (11.1%)  | 16 (8.5%)      |                                   |
| <b>ANA</b>                                     |                |             |                | <b>&lt;<br/>0.001<sup>1</sup></b> |
| Negative                                       | 41 (95.3%)     | 89 (51.1%)  | 130<br>(59.9%) |                                   |
| Positive                                       | 2 (4.7%)       | 85 (48.9%)  | 87 (40.1%)     |                                   |
| <b>dsDNA</b>                                   |                |             |                | <b>&lt;<br/>0.001<sup>1</sup></b> |
| Negative                                       | 34<br>(100.0%) | 80 (74.1%)  | 114<br>(80.3%) |                                   |
| Positive                                       | 0 (0.0%)       | 28 (25.9%)  | 28 (19.7%)     |                                   |
| <b>SSA</b>                                     |                |             |                | 0.134 <sup>1</sup>                |
| Negative                                       | 31 (96.9%)     | 124 (85.5%) | 155<br>(87.6%) |                                   |
| Positive                                       | 1 (3.1%)       | 21 (14.5%)  | 22 (12.4%)     |                                   |
| <b>SSB</b>                                     |                |             |                | 0.367 <sup>1</sup>                |
| Negative                                       | 32<br>(100.0%) | 136 (93.8%) | 168<br>(94.9%) |                                   |
| Positive                                       | 0 (0.0%)       | 9 (6.2%)    | 9 (5.1%)       |                                   |
| <b>Sm</b>                                      |                |             |                | 1.000 <sup>1</sup>                |

|            |                |             |                    |
|------------|----------------|-------------|--------------------|
| Negative   | 32<br>(100.0%) | 142 (97.9%) | 174<br>(98.3%)     |
| Positive   | 0 (0.0%)       | 3 (2.1%)    | 3 (1.7%)           |
| <b>RNP</b> |                |             | 0.697 <sup>1</sup> |
| Negative   | 31 (96.9%)     | 134 (92.4%) | 165<br>(93.2%)     |
| Positive   | 1 (3.1%)       | 11 (7.6%)   | 12 (6.8%)          |

1. Fisher's Exact Test for Count Data
2. Wilcoxon rank sum test

\*Patients could contribute to multiple autoimmune diseases

^One patient had discoid lupus erythematosus without a diagnosis of SLE, not included.

No patients had systemic sclerosis.

No patients were positive of scl70 or Jo1.

**Supplementary etable 2: Comparison of subgroup of MOGAD adults with persistent MOG-IgG1.**

| Adulthood onset                   | MOGAD<br>Persistent MOG-<br>IgG1<br>(N=71) | AQP4-IgG<br>NMOSD<br>(N=352) | Total<br>(N=416) | p value                           |
|-----------------------------------|--------------------------------------------|------------------------------|------------------|-----------------------------------|
| <b>Sex</b>                        |                                            |                              |                  | <b>&lt;<br/>0.001<sup>1</sup></b> |
| F                                 | 40 (56.3%)                                 | 296 (84.1%)                  | 336<br>(79.4%)   |                                   |
| M                                 | 31 (43.7%)                                 | 56 (15.9%)                   | 87<br>(20.6%)    |                                   |
| <b>Age</b>                        |                                            |                              |                  | <b>0.021<sup>2</sup></b>          |
| Median                            | 40.0                                       | 46.0                         | 45.0             |                                   |
| IQR                               | 30.0, 53.0                                 | 35.0, 56.0                   | 34.0, 55.0       |                                   |
| <b>Any autoimmune disease*</b>    | 8 (11.3%)                                  | 118 (33.5%)                  | 126<br>(29.8%)   | <b>&lt;<br/>0.001<sup>1</sup></b> |
| <b>Rheumatoid arthritis</b>       | 1 (1.4%)                                   | 9 (2.6%)                     | 10 (2.4%)        | 1.000 <sup>1</sup>                |
| <b>SLE</b>                        | 0 (0.0%)                                   | 25 (7.1%)                    | 25 (5.9%)        | <b>0.012<sup>1</sup></b>          |
| <b>Autoimmune thyroid disease</b> | 6 (8.5%)                                   | 69 (19.6%)                   | 75<br>(17.7%)    | <b>0.026<sup>1</sup></b>          |
| <b>Sjogren's syndrome</b>         | 1 (1.4%)                                   | 18 (5.1%)                    | 19 (4.5%)        | 0.221 <sup>1</sup>                |
| <b>APS</b>                        | 0 (0.0%)                                   | 8 (2.3%)                     | 8 (1.9%)         | 0.362 <sup>1</sup>                |
| <b>Myasthenia Gravis</b>          | 0 (0.0%)                                   | 12 (3.4%)                    | 12 (2.8%)        | 0.231 <sup>1</sup>                |

|                                                |             |             |             |                                |
|------------------------------------------------|-------------|-------------|-------------|--------------------------------|
| <b>MCTD</b>                                    | 0 (0.0%)    | 2 (0.6%)    | 2 (0.5%)    | 1.000 <sup>1</sup>             |
| <b>Polymyositis</b>                            | 0 (0.0%)    | 1 (0.3%)    | 1 (0.2%)    | 1.000 <sup>1</sup>             |
| <b>Acetylcholine Receptor Binding (muscle)</b> |             |             |             | 0.025 <sup>1</sup>             |
| Negative                                       | 44 (100.0%) | 128 (88.9%) | 172 (91.5%) |                                |
| Positive                                       | 0 (0.0%)    | 16 (11.1%)  | 16 (8.6%)   |                                |
| <b>ANA</b>                                     |             |             |             | <<br><b>0.001</b> <sup>1</sup> |
| Negative                                       | 48 (96.0%)  | 89 (51.1%)  | 137 (61.2%) |                                |
| Positive                                       | 2 (4.0%)    | 85 (48.9%)  | 87 (38.8%)  |                                |
| <b>dsDNA</b>                                   |             |             |             | <b>&lt;0.001</b> <sup>1</sup>  |
| Negative                                       | 37 (97.4%)  | 48 (69.6%)  | 85 (79.4%)  |                                |
| Positive                                       | 1 (2.6%)    | 21 (30.4%)  | 22 (20.6%)  |                                |
| <b>SSA</b>                                     |             |             |             | <b>0.050</b> <sup>1</sup>      |
| Negative                                       | 37 (97.4%)  | 124 (85.5%) | 161 (88.0%) |                                |
| Positive                                       | 1 (2.6%)    | 21 (14.5%)  | 22 (12.0%)  |                                |
| <b>SSB</b>                                     |             |             |             | 0.207 <sup>1</sup>             |
| Negative                                       | 38 (100.0%) | 136 (93.8%) | 174         |                                |

|            |             |             |                |                    |
|------------|-------------|-------------|----------------|--------------------|
|            |             |             | (95.1%)        |                    |
| Positive   | 0 (0.0%)    | 9 (6.2%)    | 9 (4.9%)       |                    |
| <b>Sm</b>  |             |             |                | 1.000 <sup>1</sup> |
| Negative   | 38 (100.0%) | 142 (97.9%) | 180<br>(98.4%) |                    |
| Positive   | 0 (0.0%)    | 3 (2.1%)    | 3 (1.6%)       |                    |
| <b>RNP</b> |             |             |                | 0.465 <sup>1</sup> |
| Negative   | 37 (97.4%)  | 134 (92.4%) | 171<br>(93.4%) |                    |
| Positive   | 1 (2.6%)    | 11 (7.6%)   | 12 (6.6%)      |                    |

3. Fisher's Exact Test for Count Data

4. Wilcoxon rank sum test

\*Patients could contribute to multiple autoimmune diseases

^One patient had discoid lupus erythematosus without a diagnosis of SLE, not included.

No patients had systemic sclerosis.

No patients were positive of scl70 or Jo1.
